# Supplementary material
Source: publisher figshare collection journal article supplement (https://tandf.figshare.com/articles/dataset/_/11808255)
Supplement: Supplementary file 1 [file 1]

Table 2. Table of richness (number of taxa) and NISP (number of identified specimens) for faunal remains that could be identified to their taxonomic group. A Shannon-Weaver diversity index is also included, which provides a measure of diversity accounting for both the richness and evenness of the faunal assemblages.

| Region        | Taxonomic Group     | Number of Taxa | NISP         | Shannon Diversity |
|---------------|---------------------|----------------|--------------|-------------------|
| South         | Invertebrates       | 6              | 1419         | 0.85              |
|               | Fish                | 5              | 526          | 1.27              |
|               | Birds               | 18             | 1241         | 1.43              |
|               | Terrestrial Mammals | 3              | 90           | 0.93              |
|               | Marine Mammals      | 7              | 2020         | 0.61              |
|               | <b>Totals</b>       | <b>39</b>      | <b>5296</b>  | <b>2</b>          |
| South-central | Invertebrates       | 7              | 7090         | 0.46              |
|               | Fish                | 5              | 3547         | 0.05              |
|               | Birds               | 21             | 5240         | 1.04              |
|               | Terrestrial Mammals | 3              | 73           | 0.31              |
|               | Marine Mammals      | 7              | 609          | 1.27              |
|               | <b>Totals</b>       | <b>43</b>      | <b>16559</b> | <b>1.52</b>       |
| North-central | Invertebrates       | 6              | 4822         | 0.28              |
|               | Fish                | 4              | 1363         | 0.24              |
|               | Birds               | 19             | 305          | 1.9               |
|               | Terrestrial Mammals | 2              | 37           | 0.3               |
|               | Marine Mammals      | 4              | 164          | 1.12              |
|               | <b>Totals</b>       | <b>35</b>      | <b>6691</b>  | <b>1.05</b>       |
| North         | Invertebrates       | 15             | 2804         | 1.64              |
|               | Fish                | 5              | 1671         | 0.35              |
|               | Birds               | 10             | 151          | 1.47              |
|               | Terrestrial Mammals | 2              | 6            | 0.69              |
|               | Marine Mammals      | 4              | 128          | 1.89              |
|               | <b>Totals</b>       | <b>36</b>      | <b>4760</b>  | <b>2.08</b>       |
