# Supplementary material
Source: publisher figshare collection journal article supplement (https://tandf.figshare.com/articles/dataset/_/11808255)
Supplement: Supplementary file 2 [file 1]

Table 1. NISP values for each taxonomic group identified from the KBP faunal assemblage.

| Taxonomic Group and Taxon        |                             | South       | South-Central | North-Central | North       |
|----------------------------------|-----------------------------|-------------|---------------|---------------|-------------|
| <b>INVERTEBRATES</b>             |                             |             |               |               |             |
|                                  | urchin                      | 773         | 365           | 110           | 224         |
|                                  | barnacle                    | 1           | 3             | 0             | 39          |
|                                  | Pectinidae                  | 0           | 0             | 0             | 1           |
|                                  | Chiton                      | 1           | 0             | 0             | 6           |
|                                  | Buccinum sp.                | 45          | 38            | 24            | 360         |
|                                  | limpet                      | 0           | 3             | 2             | 9           |
|                                  | Nucella cf. canaliculata    | 0           | 0             | 0             | 3           |
|                                  | Nucella cf. lima            | 11          | 330           | 95            | 351         |
|                                  | Nucella sp.                 | 0           | 0             | 0             | 44          |
|                                  | unident. whelk              | 15          | 194           | 5             | 1           |
|                                  | Littorina sp.               | 553         | 6135          | 4542          | 1173        |
|                                  | cf. Littorina sp.           | 20          | 2             | 11            | 0           |
|                                  | Gastropoda                  | 3           | 12            | 1             | 1           |
|                                  | Gastropoda (unanalyzed)     | 1           | 1300          | 0             | 0           |
| Gastropods (TOTAL)               |                             | 1423        | 8382          | 4790          | 2212        |
|                                  | Clinocardium sp.            | 0           | 0             | 0             | 11          |
|                                  | Hiatella arctica            | 0           | 0             | 0             | 4           |
|                                  | Modiolus sp.                | 0           | 0             | 0             | 3           |
|                                  | Mya sp.                     | 0           | 0             | 0             | 2           |
|                                  | Mytilis sp.                 | 0           | 20            | 33            | 510         |
|                                  | Serripes sp.                | 0           | 0             | 0             | 63          |
|                                  | Bivalve                     | 0           | 0             | 0             | 28          |
| Bivalves (TOTAL)                 |                             | 0           | 20            | 33            | 621         |
| <b>ALL INVERTEBRATES (TOTAL)</b> |                             | <b>1423</b> | <b>8402</b>   | <b>4823</b>   | <b>2833</b> |
| <b>FISH</b>                      |                             |             |               |               |             |
|                                  | Shark, cf. Lamniidae        | 15          | 1             | 0             | 0           |
| Sharks (TOTAL)                   |                             | 15          | 1             | 0             | 0           |
|                                  | Salmonidae                  | 7           | 24            | 0             | 907         |
| Salmon (TOTAL)                   |                             | 7           | 24            | 0             | 907         |
|                                  | Hemilepidotus sp.           | 3           | 1             | 1             | 0           |
|                                  | Cottidae                    | 224         | 5             | 3             | 2           |
| Sculpins (TOTAL)                 |                             | 227         | 6             | 4             | 2           |
|                                  | Hexagrammos sp.             | 1           | 3514          | 48            | 18          |
|                                  | cf. Hexagrammos sp.         | 0           | 1             | 0             | 0           |
|                                  | Pleurogrammus monopterygius | 0           | 0             | 20            | 0           |
|                                  | Hexagrammidae               | 211         | 0             | 44            | 13          |
| Greenlings (TOTAL)               |                             | 212         | 3515          | 112           | 31          |
|                                  | cf. Gadus sp.               | 20          | 0             | 1226          | 1           |
|                                  | Gadidae                     | 45          | 1             | 21            | 665         |
| Cod (TOTAL)                      |                             | 65          | 1             | 1247          | 666         |
|                                  | Pleuronectidae              | 0           | 0             | 0             | 65          |
| Flatfish (TOTAL)                 |                             | 0           | 0             | 0             | 65          |
|                                  | unident. fish               | 81          | 233           | 608           | 201         |
|                                  | fish, not analyzed          | 1470        | 4681          | 796           | 4           |
| Unidentified Fish (TOTAL)        |                             | 1551        | 4914          | 1404          | 205         |
| <b>ALL FISH (TOTAL)</b>          |                             | <b>2077</b> | <b>8461</b>   | <b>2767</b>   | <b>1876</b> |
| <b>BIRDS</b>                     |                             |             |               |               |             |
|                                  | Gavia arctica/pacifica      | 4           | 0             | 1             | 0           |
|                                  | Gavia immer/adamsi          | 4           | 0             | 0             | 0           |
|                                  | Gavia sp.                   | 1           | 2             | 4             | 4           |
|                                  | cf. Gavia sp.               | 1           | 0             | 0             | 0           |
|                                  | Podicepsidae                | 4           | 0             | 0             | 1           |
| Loons and Grebes (TOTAL)         |                             | 14          | 2             | 5             | 5           |
|                                  | Phoebastria cf. albatrus    | 1           | 0             | 0             | 0           |
|                                  | Phoebastria cf. nigripes    | 1           | 0             | 0             | 0           |
|                                  | Phoebastria sp.             | 311         | 1242          | 6             | 2           |
|                                  | cf. Phoebastria sp.         | 1           | 20            | 0             | 0           |
| Albatrosses (TOTAL)              |                             | 314         | 1262          | 6             | 2           |
|                                  | Puffinus sp.                | 21          | 1             | 1             | 0           |

|                                     |                                         |     |      |     |    |
|-------------------------------------|-----------------------------------------|-----|------|-----|----|
|                                     | Fulmarus glacialis                      | 38  | 500  | 86  | 0  |
|                                     | cf. Fulmarus glacialis                  | 6   | 78   | 9   | 0  |
|                                     | Procellariidae                          | 3   | 2    | 0   | 0  |
|                                     | Oceanodroma sp.                         | 2   | 28   | 1   | 0  |
| Tubenouts (TOTAL)                   |                                         | 70  | 609  | 97  | 0  |
|                                     | Phalacrocorax cf. pelagicus             | 3   | 2    | 1   | 0  |
|                                     | Phalacrocorax sp.                       | 299 | 169  | 61  | 73 |
|                                     | cf. Phalacrocorax sp.                   | 7   | 8    | 2   | 3  |
| Cormorants (TOTAL)                  |                                         | 309 | 179  | 64  | 76 |
|                                     | Aethia cristatella                      | 0   | 4    | 0   | 0  |
|                                     | Aethia cf. cristatella                  | 0   | 0    | 1   | 0  |
|                                     | Aethia pusilla                          | 0   | 3    | 0   | 0  |
|                                     | Aethia cf. pusilla                      | 0   | 3    | 0   | 0  |
|                                     | Aethia pygmaea                          | 0   | 4    | 0   | 0  |
|                                     | Aethia sp.                              | 8   | 1633 | 19  | 0  |
|                                     | Alcidae, cf. Aethia sp.                 | 1   | 9    | 0   | 0  |
|                                     | Cephus sp.                              | 0   | 2    | 0   | 0  |
|                                     | Alcidae, cf. Cephus sp.                 | 0   | 0    | 0   | 1  |
|                                     | Fratercula cf. cirrhata                 | 0   | 1    | 0   | 0  |
|                                     | Fratercula sp.                          | 29  | 813  | 28  | 7  |
|                                     | Alcidae, cf. Fratercula sp.             | 3   | 54   | 3   | 0  |
|                                     | Uria cf. lomvia                         | 1   | 1    | 0   | 0  |
|                                     | Alcidae, cf. Uria sp.                   | 4   | 15   | 1   | 1  |
|                                     | Uria sp.                                | 84  | 150  | 6   | 6  |
|                                     | Alcidae                                 | 6   | 107  | 1   | 3  |
|                                     | cf. Alcidae                             | 0   | 7    | 0   | 0  |
|                                     | Alcidae, large                          | 0   | 1    | 0   | 0  |
| Auklets, puffins, and murre (TOTAL) |                                         | 136 | 2807 | 59  | 18 |
|                                     | Anatidae, cf. Clangula hyemalis         | 0   | 1    | 0   | 0  |
|                                     | Anatidae, cf. Histrionicus histrionicus | 0   | 1    | 1   | 0  |
|                                     | Anatidae, cf. Somateria sp.             | 1   | 0    | 1   | 0  |
|                                     | Anatidae, duck                          | 31  | 77   | 13  | 25 |
|                                     | cf. Anatidae, small duck                | 0   | 0    | 0   | 1  |
|                                     | cf. Anatidae, duck                      | 0   | 2    | 0   | 0  |
|                                     | Anatidae, goose                         | 7   | 94   | 7   | 0  |
|                                     | Anatidae, goose/duck                    | 0   | 2    | 0   | 0  |
|                                     | cf. Anatidae, goose                     | 0   | 11   | 0   | 0  |
|                                     | Cygnus sp.                              | 0   | 0    | 1   | 0  |
|                                     | Anatidae, goose/swan                    | 2   | 0    | 0   | 0  |
|                                     | Anatidae, large                         | 0   | 0    | 4   | 0  |
|                                     | Anatidae                                | 1   | 44   | 6   | 0  |
| Ducks, geese, and swans (TOTAL)     |                                         | 42  | 232  | 33  | 26 |
|                                     | Larus cf. schistisagus                  | 0   | 1    | 0   | 0  |
|                                     | Larus sp.                               | 34  | 58   | 6   | 19 |
|                                     | cf. Larus sp.                           | 1   | 0    | 0   | 2  |
|                                     | Rissa sp.                               | 1   | 7    | 2   | 0  |
|                                     | cf. Rissa sp.                           | 3   | 0    | 1   | 0  |
| Gulls (TOTAL)                       |                                         | 39  | 66   | 9   | 21 |
|                                     | Haliaeetus sp.                          | 290 | 45   | 2   | 0  |
|                                     | Falco peregrinus                        | 0   | 1    | 0   | 0  |
|                                     | cf. Haliaeetus sp.                      | 8   | 2    | 0   | 0  |
|                                     | Strigidae                               | 0   | 1    | 5   | 0  |
|                                     | Strigidae, cf. Nyctea scandiaca         | 0   | 0    | 3   | 0  |
|                                     | cf. Strigidae                           | 0   | 1    | 0   | 0  |
|                                     | unident. raptor                         | 14  | 22   | 0   | 0  |
| Raptors (TOTAL)                     |                                         | 312 | 72   | 10  | 0  |
|                                     | Corvus cf. machrorhynchos               | 4   | 2    | 0   | 0  |
|                                     | cf. Corvidae, Corvus sp.                | 0   | 0    | 0   | 1  |
|                                     | Corvus sp.                              | 1   | 9    | 11  | 2  |
|                                     | unident. Passerine                      | 0   | 12   | 0   | 0  |
| Songbirds (TOTAL)                   |                                         | 5   | 23   | 11  | 3  |
|                                     | Lagopus sp.                             | 0   | 0    | 11  | 0  |
| Ptarmigan (TOTAL)                   |                                         | 0   | 0    | 11  | 0  |
|                                     | unident. bird                           | 388 | 2083 | 130 | 76 |
|                                     | unident. bird (large)                   | 0   | 4    | 0   | 0  |

|                            |                         |             |             |            |            |
|----------------------------|-------------------------|-------------|-------------|------------|------------|
|                            | unident. bird (medium)  | 12          | 41          | 2          | 1          |
|                            | unident. bird (pending) | 31          | 140         | 1          | 15         |
|                            | unident. bird (small)   | 0           | 0           | 1          | 0          |
| Unidentified Birds (TOTAL) |                         | 431         | 2268        | 134        | 92         |
| <b>ALL BIRDS (TOTAL)</b>   |                         | <b>1672</b> | <b>7520</b> | <b>439</b> | <b>243</b> |

# MAMMALS

|                                  |                                       |             |             |            |            |
|----------------------------------|---------------------------------------|-------------|-------------|------------|------------|
|                                  | Canis familiaris                      | 17          | 3           | 3          | 2          |
|                                  | Canidae, cf. Canis familiaris         | 3           | 1           | 0          | 0          |
|                                  | Vulpes vulpes                         | 38          | 49          | 31         | 2          |
|                                  | Canidae, cf. Vulpes vulpes            | 8           | 3           | 1          | 2          |
|                                  | Canidae                               | 7           | 14          | 2          | 0          |
|                                  | Carnivora, cf. Canidae                | 1           | 0           | 0          | 0          |
| Dogs and foxes (TOTAL)           |                                       | 74          | 70          | 37         | 6          |
|                                  | Enhydra lutris                        | 200         | 30          | 10         | 29         |
|                                  | Carnivora, cf. Enhydra lutris         | 7           | 2           | 5          | 2          |
|                                  | Ursus arctos                          | 9           | 0           | 0          | 0          |
|                                  | Carnivora                             | 2           | 2           | 0          | 0          |
| Other Carnivores (TOTAL)         |                                       | 218         | 34          | 15         | 31         |
|                                  | Callorhinus ursinus                   | 47          | 114         | 26         | 1          |
|                                  | cf. Callorhinus ursinus               | 8           | 9           | 6          | 0          |
|                                  | Eumetopias jubatus                    | 142         | 62          | 40         | 20         |
|                                  | cf. Eumetopias jubatus                | 7           | 2           | 2          | 2          |
|                                  | Zalophus japonicus                    | 1           | 1           | 0          | 0          |
|                                  | Otariidae                             | 62          | 17          | 13         | 4          |
|                                  | Pinniped, cf. Otariidae               | 4           | 0           | 1          | 3          |
|                                  | Otariidae (Cu/Ej)                     | 16          | 11          | 5          | 1          |
|                                  | Otariinae                             | 2           | 0           | 0          | 0          |
| Fur seals and sea lions (TOTAL)  |                                       | 289         | 216         | 93         | 31         |
|                                  | Phoca vitulina                        | 12          | 5           | 4          | 2          |
|                                  | Phocidae, cf. Phoca vitulina          | 1           | 2           | 0          | 0          |
|                                  | Phoca vitulina/largha                 | 4           | 0           | 0          | 0          |
|                                  | Phoca sp.                             | 285         | 261         | 42         | 54         |
|                                  | Phocidae, cf. Phoca sp.               | 23          | 7           | 3          | 3          |
|                                  | Pusa hispida                          | 1           | 1           | 0          | 0          |
|                                  | Phocidae, cf. Pusa hispida            | 2           | 0           | 0          | 0          |
|                                  | Phocidae                              | 147         | 10          | 0          | 0          |
|                                  | Pinniped, cf. Phocidae                | 12          | 1           | 0          | 2          |
| True seals (TOTAL)               |                                       | 487         | 287         | 49         | 61         |
|                                  | Pinniped                              | 67          | 58          | 7          | 5          |
|                                  | Bos taurus                            | 3           | 0           | 0          | 0          |
|                                  | Sus scrofa                            | 1           | 0           | 0          | 0          |
|                                  | Artiodactyla                          | 5           | 1           | 0          | 0          |
| Artiodactyls (TOTAL)             |                                       | 9           | 1           | 0          | 0          |
|                                  | Delphinidae, cf. Pseudorca crassidens | 1           | 0           | 0          | 0          |
|                                  | Phocoenidae                           | 962         | 15          | 0          | 0          |
|                                  | cf. Phocoenidae                       | 7           | 1           | 0          | 0          |
| Dolphins and porpoises (TOTAL)   |                                       | 970         | 16          | 0          | 0          |
|                                  | Odontocete (large)                    | 1           | 0           | 0          | 0          |
|                                  | Cetacea                               | 565         | 75          | 24         | 10         |
|                                  | cf. Cetacea                           | 12          | 3           | 1          | 1          |
|                                  | Cetacea (medium)                      | 0           | 1           | 0          | 1          |
| Other Cetaceans (TOTAL)          |                                       | 578         | 79          | 25         | 12         |
|                                  | unident. mammal                       | 1905        | 681         | 390        | 166        |
|                                  | unident. mammal (small)               | 0           | 0           | 0          | 3          |
|                                  | unident. mammal (medium)              | 210         | 0           | 12         | 0          |
|                                  | unident. mammal (large)               | 68          | 3           | 4          | 1          |
|                                  | unident. mammal (marine)              | 0           | 1           | 0          | 0          |
|                                  | mammal, not ID-ed                     | 6           | 120         | 0          | 0          |
| Unidentified Mammals (TOTAL)     |                                       | 2189        | 805         | 406        | 170        |
| <b>ALL MAMMALS (TOTAL)</b>       |                                       | <b>4881</b> | <b>1566</b> | <b>632</b> | <b>316</b> |
|                                  | unident. vertebrate                   | 52          | 136         | 140        | 15         |
| Unidentified Vertebrates (TOTAL) |                                       | 52          | 136         | 140        | 15         |
